# Supplementary material for: Isolation of hydroxyapatite from Atlantic salmon processing waste using a protease and lipase mixture
Source: Royal Society of Chemistry journal article supplement (doi:10.1039/d3su00102d), 2023-01-01
Supplement: d3su00102d1.pdf [file d3su00102d1.pdf]

## Supplementary Information

### Isolation of Hydroxyapatite from Atlantic Salmon Processing Waste Using a Protease and Lipase Mixture

Sarah Boudreau<sup>a</sup>, Sabahudin Hrapovic<sup>b</sup>, Yali Liu<sup>b</sup>, Alfred C. W. Leung<sup>b</sup>, Edmond Lam<sup>\*b,c</sup>, and Francesca M. Kerton<sup>\*a</sup>

- a) Department of Chemistry, Memorial University, St. John's, NL, A1B 3X7, Canada
- b) Aquatic and Crop Resource Development, National Research Council Canada, Montreal, QC, H4P 2R2, Canada
- c) Department of Chemistry, McGill University, 801 Sherbrooke St. West, Montreal, QC, H3A 0B8, Canada

fkerton@mun.ca

edmond.lam@nrc-nrc.gc.ca; Edmond.lam@mcgill.ca

|                                                                                                                                                                                            |    |
|--------------------------------------------------------------------------------------------------------------------------------------------------------------------------------------------|----|
| <b>Figure S1.</b> Images of samples used for Neutrased-only experiments. -----                                                                                                             | 2  |
| <b>Figure S2.</b> Response surface of wt. loss from enzymatically treating salmon frames based on Neutrased loading and the temperature of the reaction. -----                             | 2  |
| <b>Figure S3.</b> Response surface of wt. loss from enzymatically treating salmon frames based on the length and the temperature of the reaction.-----                                     | 3  |
| <b>Figure S4.</b> Response surface of whether an enzyme treatment is successful to hydrolyze all meat from the salmon frames based on enzyme loading and the length of the reaction. ----- | 3  |
| <b>Figure S5.</b> FTIR spectrum of freeze-dried, raw salmon meat.-----                                                                                                                     | 5  |
| <b>Figure S6.</b> FTIR spectrum of crude sHAP. -----                                                                                                                                       | 6  |
| <b>Figure S7.</b> FTIR spectra of 3 samples treated with 5 $\mu\text{L g}^{-1}$ Neutrased for 6 h at 55 $^{\circ}\text{C}$ . -----                                                         | 7  |
| <b>Figure S8.</b> FTIR spectra of 3 samples treated with 25 $\mu\text{L g}^{-1}$ Neutrased and 25 $\mu\text{L g}^{-1}$ Lipozyme CALB L for 24 h at 55 $^{\circ}\text{C}$ . -----           | 7  |
| <b>Figure S9.</b> Image of sample used for Neutrased and Lipozyme CALB L optimization experiments. -----                                                                                   | 8  |
| <b>Figure S10.</b> FTIR spectrum of pure sHAP. -----                                                                                                                                       | 8  |
| <b>Figure S11.</b> XRD diffractogram of crude sHAP. -----                                                                                                                                  | 9  |
| <b>Figure S12.</b> XRD diffractogram of pure sHAP.-----                                                                                                                                    | 9  |
| <b>Figure S13.</b> $^1\text{H MAS NMR}$ spectra of pure sHAP and freeze-dried, raw salmon meat.-----                                                                                       | 10 |
| <b>Table S1.</b> Wt. loss from Neutrased optimization experiments to isolate sHAP. -----                                                                                                   | 4  |
| <b>Table S2.</b> Peak list and assignment of FTIR spectrum of freeze-dried, raw salmon meat. -----                                                                                         | 5  |
| <b>Table S3.</b> Peak list and assignment of FTIR spectrum of crude sHAP. -----                                                                                                            | 6  |
| <b>Table S4.</b> Peak list and assignment of FTIR spectrum of pure sHAP.-----                                                                                                              | 9  |
| <b>Equation S1.</b> Dynamic light scattering PDI. -----                                                                                                                                    | 10 |
| <b>Life Cycle Analysis.</b> -----                                                                                                                                                          | 11 |

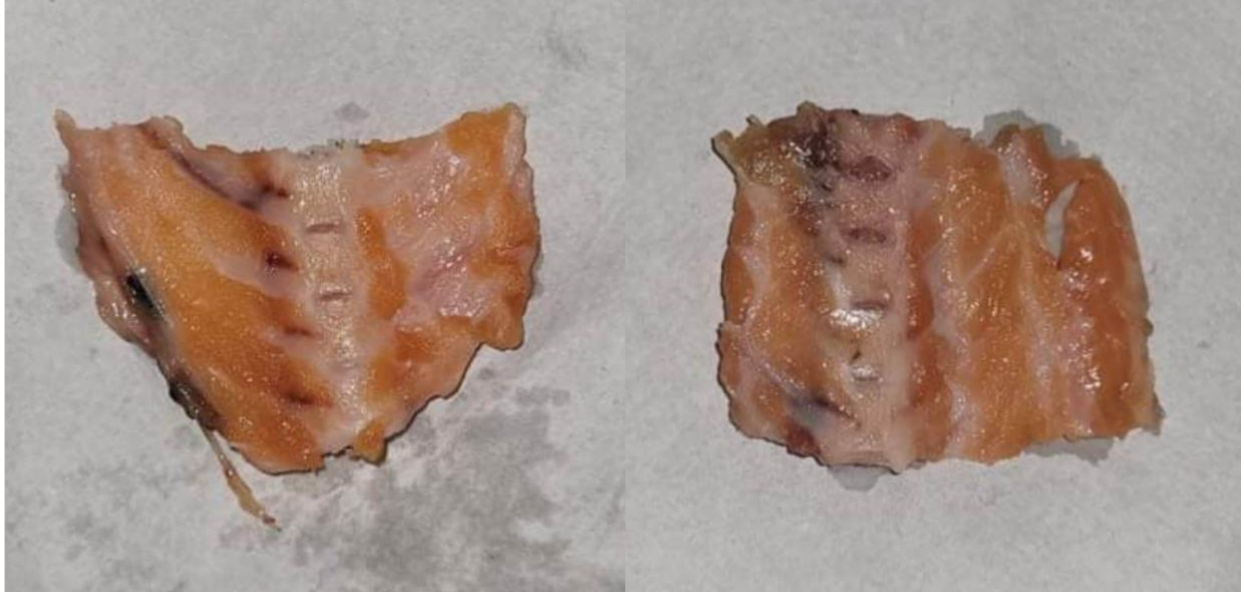

**Figure S1.** Images of 15 – 50 g samples used for Neutrase-only experiments ( $\sim 5 \times 7$  cm).

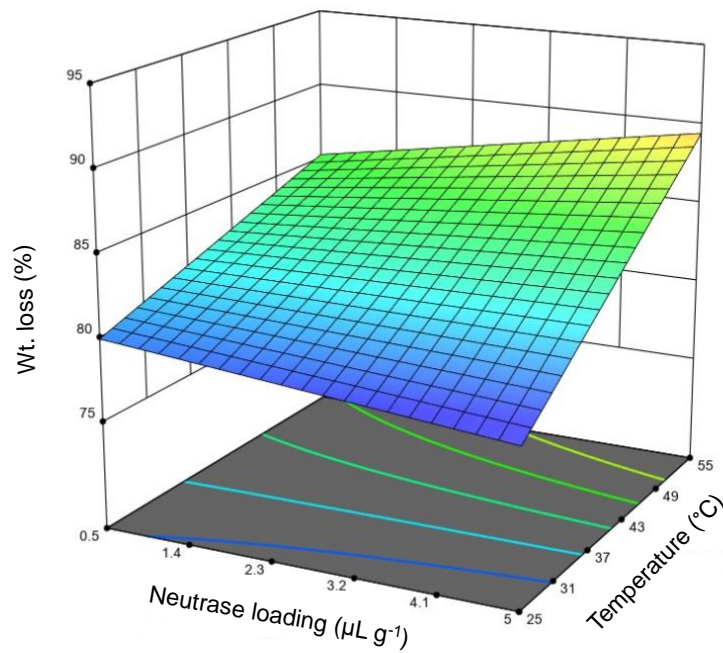

**Figure S2.** Response surface of wt. loss from enzymatically treating salmon frames based on Neutrase loading and the temperature of the reaction. Wt. loss increases as the temperature and Neutrase loading increase.

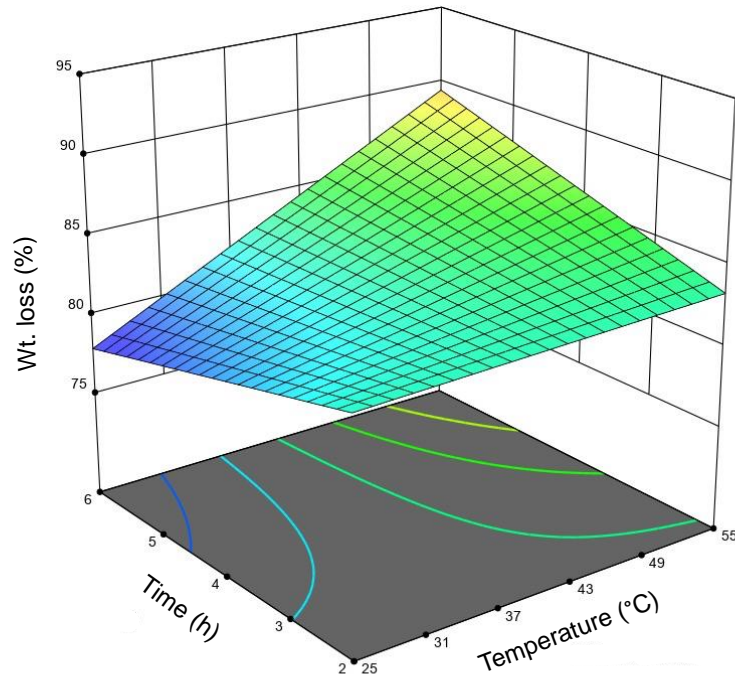

**Figure S3.** Response surface of wt. loss from enzymatically treating salmon frames based on the length and the temperature of the reaction. The wt. loss increases as the loading of both enzymes and the time increase.

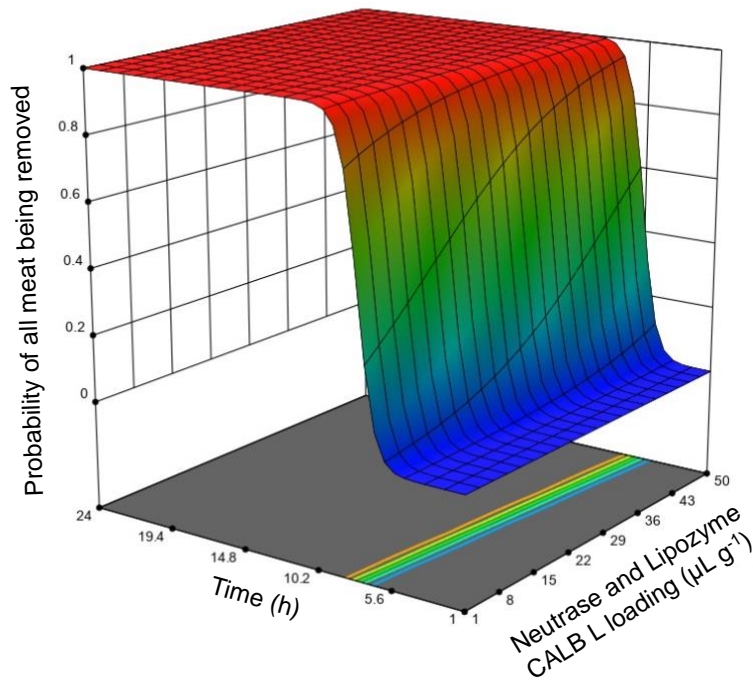

**Figure S4.** Response surface of whether an enzyme treatment is successful to hydrolyze all meat from the salmon frames based on enzyme loading and the length of the reaction. The probability of all meat being hydrolyzed from the salmon frame increases as the enzyme loading and the length of the reaction increase.

**Table S1.** Wt. loss from Neutrase optimization experiments to isolate sHAP including pass/fail response.

| Entry | Enzyme loading ( $\mu\text{L g}^{-1}$ ) | Temperature<br>( $^{\circ}\text{C}$ ) | Time (h) | Wt. loss (%) | Pass/fail |
|-------|-----------------------------------------|---------------------------------------|----------|--------------|-----------|
| 1A    | 5.0                                     | 55.0                                  | 6        | 92.1         | Fail      |
| 1B    | 5.0                                     | 55.0                                  | 2        | 87.1         | Fail      |
| 1C    | 0.50                                    | 55.0                                  | 6        | 88.1         | Fail      |
| 1D    | 0.50                                    | 55.0                                  | 2        | 82.2         | Fail      |
| 1E    | 5.0                                     | 25.0                                  | 6        | 79.4         | Fail      |
| 1F    | 5.0                                     | 25.0                                  | 2        | 82.0         | Fail      |
| 1G    | 0.50                                    | 25.0                                  | 6        | 78.6         | Fail      |
| 1H    | 0.50                                    | 25.0                                  | 2        | 89.2         | Fail      |
| 1I    | 2.8                                     | 40.0                                  | 6        | 79.8         | Fail      |
| 1J    | 0.50                                    | 40.0                                  | 4        | 86.8         | Fail      |
| 1K    | 5.0                                     | 40.0                                  | 4        | 81.6         | Fail      |
| 1L    | 2.8                                     | 40.0                                  | 2        | 82.8         | Fail      |
| 1M    | 2.8                                     | 55.0                                  | 4        | 79.5         | Fail      |
| 1N    | 2.8                                     | 25.0                                  | 4        | 84.4         | Fail      |
| 1O    | 1.6                                     | 47.5                                  | 5        | 84.3         | Fail      |
| 1P    | 1.6                                     | 47.5                                  | 3        | 87.0         | Fail      |
| 1Q    | 3.9                                     | 47.5                                  | 5        | 87.4         | Fail      |
| 1R    | 5.0                                     | 55.0                                  | 4        | 84.0         | Fail      |
| 1S    | 5.0                                     | 55.0                                  | 2        | 84.3         | Fail      |
| 1T    | 0.50                                    | 55.0                                  | 4        | 83.9         | Fail      |
| 1U    | 3.5                                     | 55.0                                  | 6        | 87.3         | Fail      |

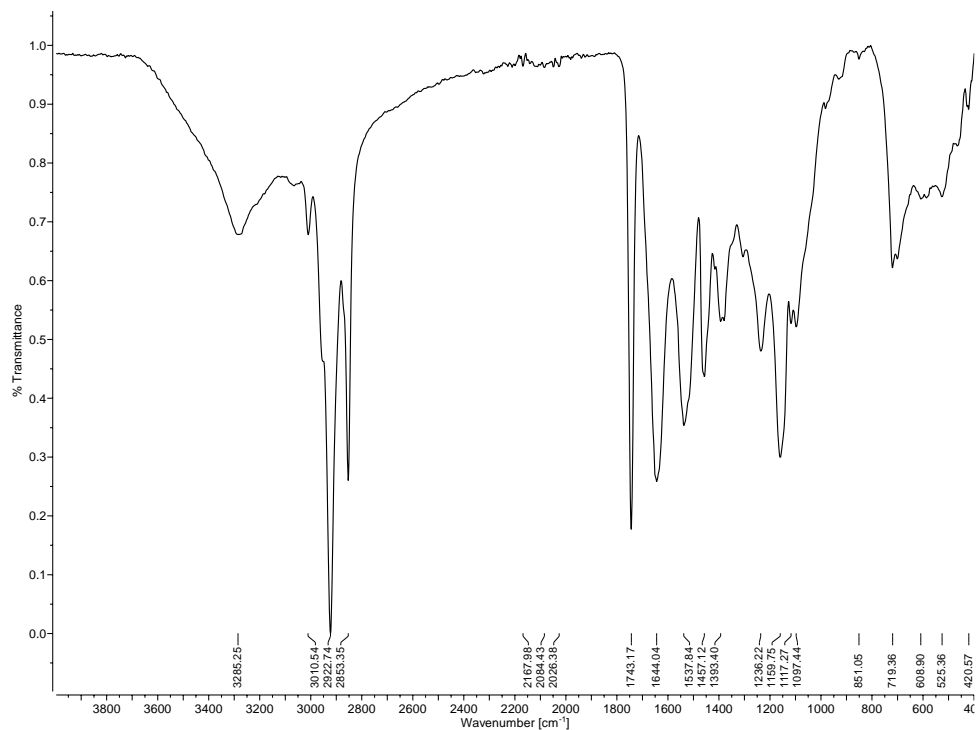

**Figure S5.** FTIR spectrum of freeze-dried, raw salmon meat.

**Table S2.** Peak list and assignment of FTIR spectrum of freeze-dried, raw salmon meat.

| Functional group              | Assignment            | Wavenumber (cm <sup>-1</sup> ) |
|-------------------------------|-----------------------|--------------------------------|
| -OH                           | Water/proteins/lipids | 3285                           |
| -C-H                          | Proteins/lipids       | 3010, 2923, 2853, 1457, 1393   |
| -C=O                          | Collagen/lipids       | 1743                           |
| -CONH <sub>2</sub>            | Collagen              | 1644, 1538, 1236               |
| -COOC-                        | Lipids                | 1305, 1160, 1097               |
| PO <sub>4</sub> <sup>3-</sup> | Lipids                | 1117, 1097, 609, 525           |
| C=C                           | Lipids                | 851                            |

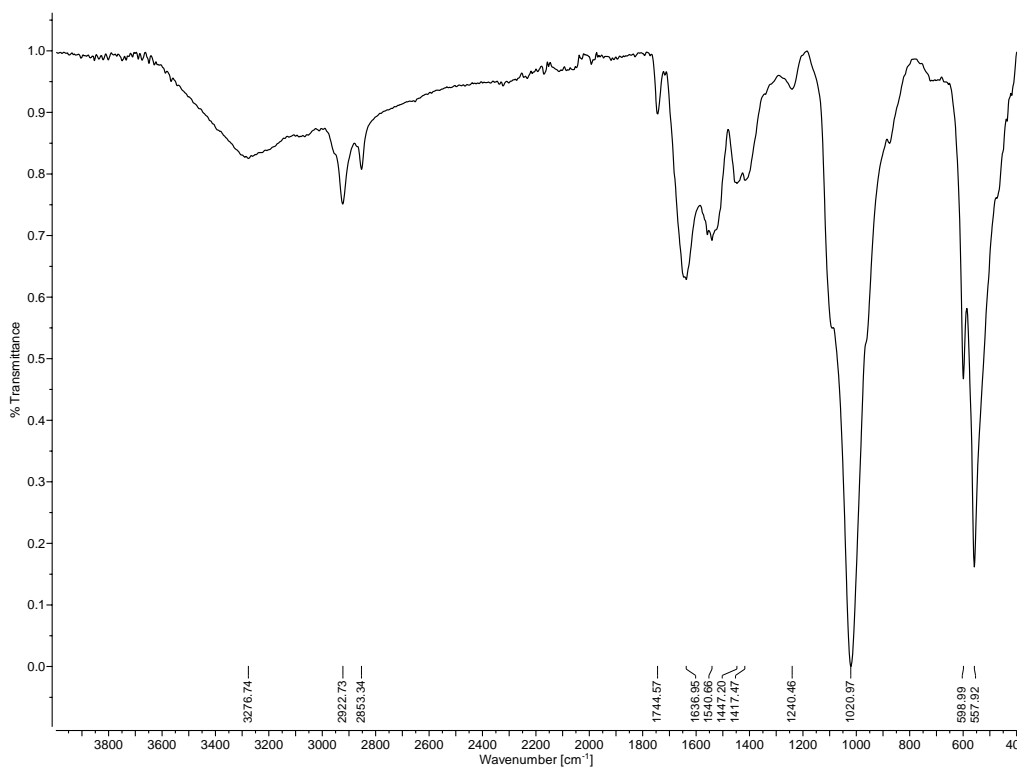

**Figure S6.** FTIR spectrum of crude sHAP (1A: 5  $\mu\text{L g}^{-1}$  Neutrased, 6 h, 55  $^{\circ}\text{C}$ ).

**Table S3.** Peak list and assignment of FTIR spectrum of crude sHAP (1A: 5  $\mu\text{L g}^{-1}$  Neutrased, 6 h, 55  $^{\circ}\text{C}$ ).

| Functional group              | Assignment      | Wavenumber ( $\text{cm}^{-1}$ ) |
|-------------------------------|-----------------|---------------------------------|
| -OH                           | Water           | 3277                            |
| -C-H                          | Proteins/lipids | 2923, 2853                      |
| -C=O                          | Collagen/lipids | 1745                            |
| -CONH <sub>2</sub>            | Collagen        | 1637, 1541, 1241                |
| CO <sub>3</sub> <sup>2-</sup> | Carbonate ions  | 1447, 1417                      |
| PO <sub>4</sub> <sup>3-</sup> | HAP             | 1021, 599, 558                  |

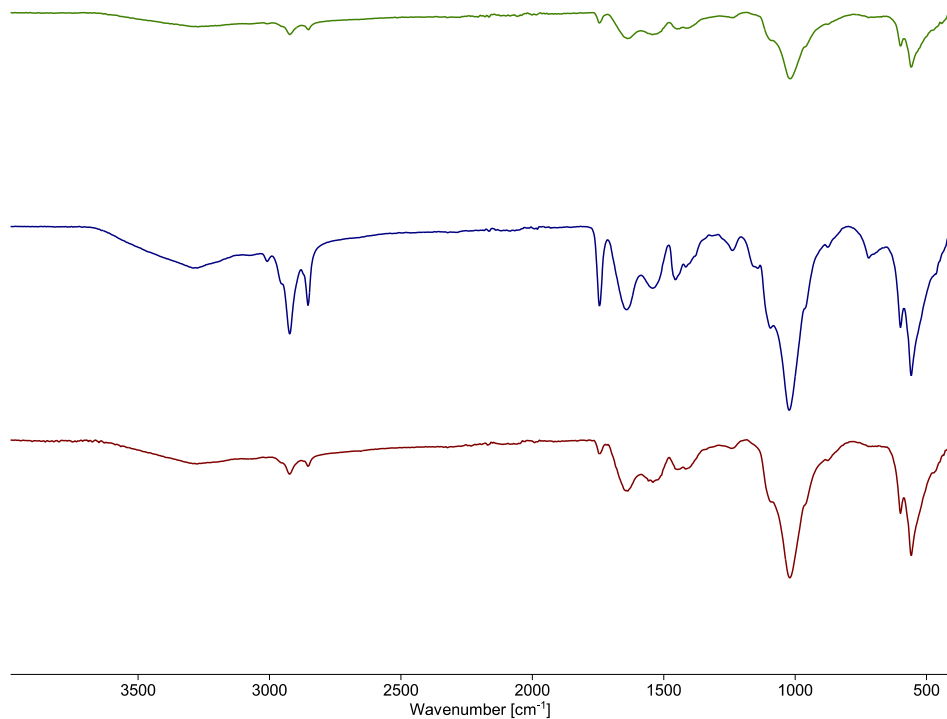

**Figure S7.** FTIR spectra of 3 samples treated with  $5 \mu\text{L g}^{-1}$  Neutralse for 6 h at  $55 \text{ }^\circ\text{C}$ . The relative intensity of the carbonyl stretch associated with lipid presence is inconsistent between spectra.

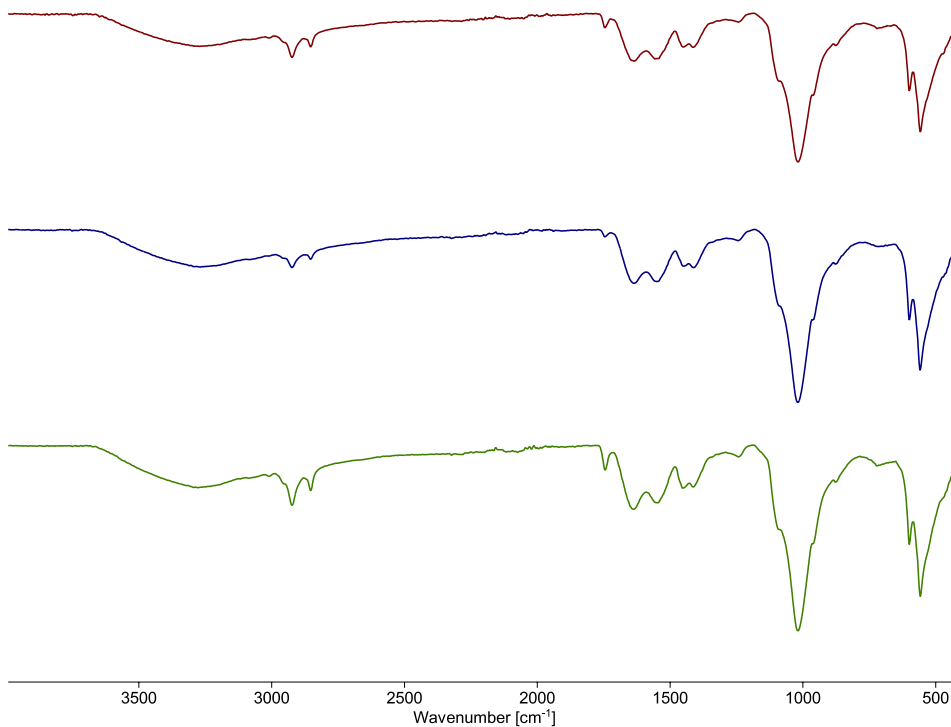

**Figure S8.** FTIR spectra of 3 samples treated with  $25 \mu\text{L g}^{-1}$  Neutralse and  $25 \mu\text{L g}^{-1}$  Lipozyme CALB L for 24 h at  $55 \text{ }^\circ\text{C}$ . The relative intensities of all stretches are consistent.

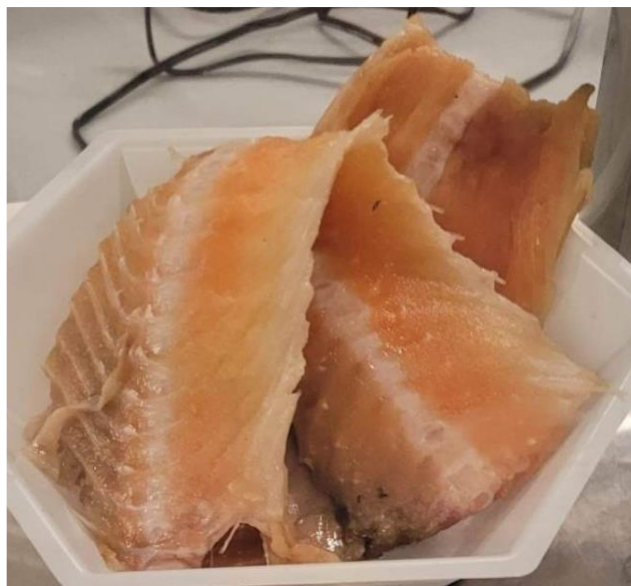

**Figure S9.** Image of sample used for Neutrase and Lipozyme CALB L optimization experiments.

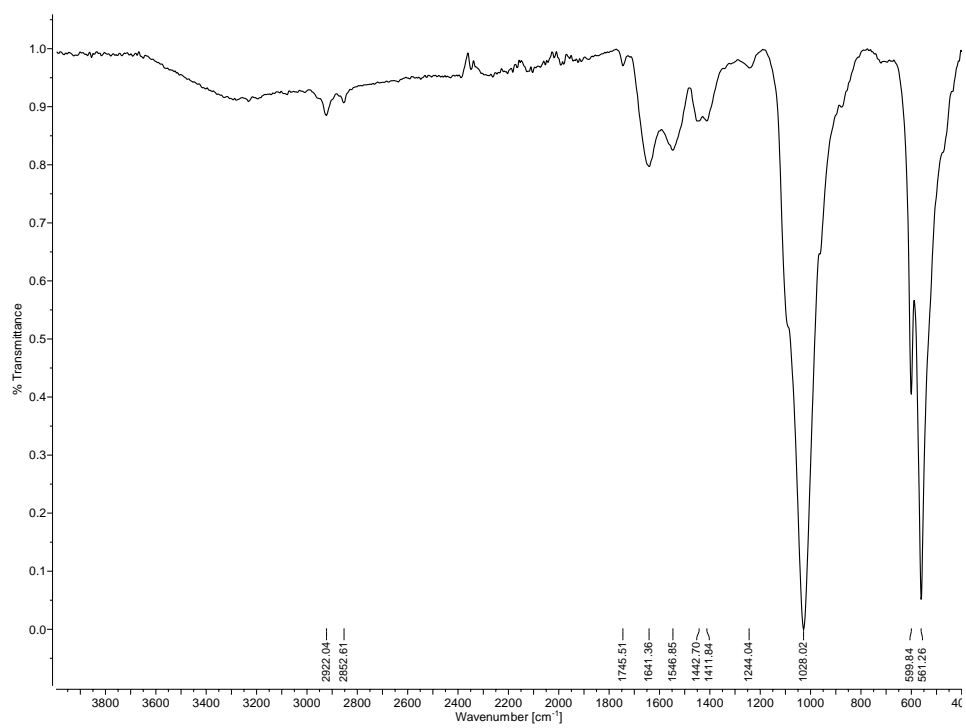

**Figure S10.** FTIR spectrum of pure sHAP (2Q: 15  $\mu\text{L g}^{-1}$  Neutrase, 7.5  $\mu\text{L g}^{-1}$  Lipozyme CALB L, 6 h, 40 °C).



**Table S4.** Peak list and assignment of FTIR spectrum of pure sHAP (2Q: 15  $\mu\text{L g}^{-1}$  Neutrased, 7.5  $\mu\text{L g}^{-1}$  Lipozyme CALB L, 6 h, 40  $^{\circ}\text{C}$ ).

| Functional group              | Assignment                   | Wavenumber ( $\text{cm}^{-1}$ ) |
|-------------------------------|------------------------------|---------------------------------|
| -C-H                          | Collagen                     | 2922, 2853                      |
| -C=O                          | Collagen/amino acid residues | 1746                            |
| -CONH <sub>2</sub>            | Collagen                     | 1641, 1547, 1244                |
| CO <sub>3</sub> <sup>2-</sup> | Carbonate ions               | 1443, 1412                      |
| PO <sub>4</sub> <sup>3-</sup> | HAP                          | 1021, 599, 561                  |

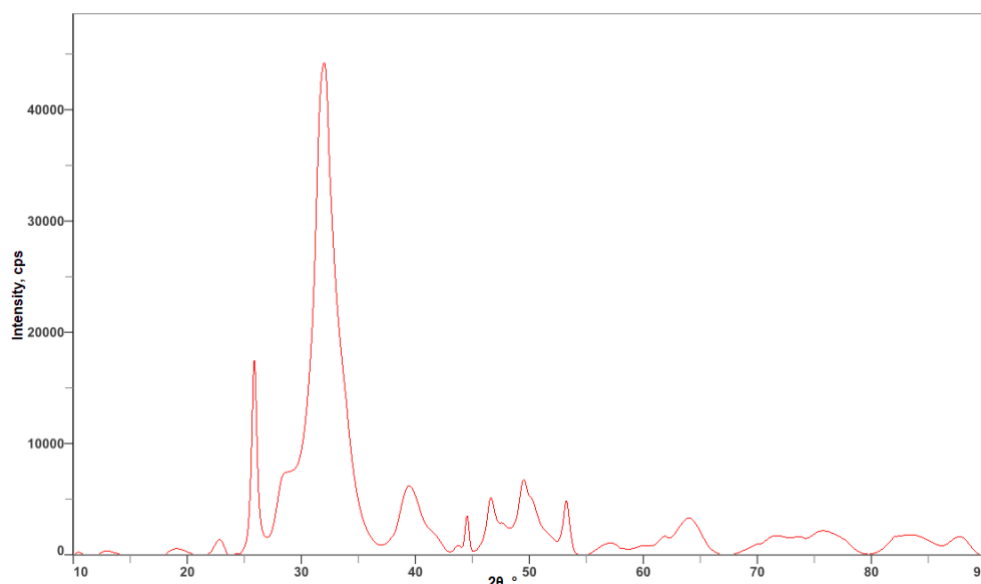

**Figure S11.** XRD diffractogram of crude sHAP (1A: 5  $\mu\text{L g}^{-1}$  Neutrased, 6 h, 55  $^{\circ}\text{C}$ ).

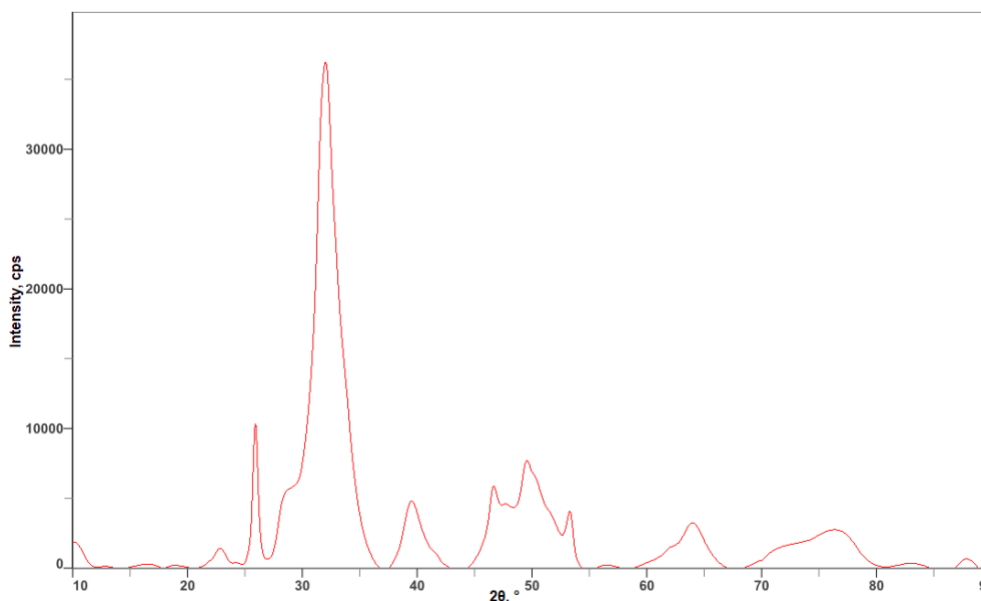

**Figure S12.** XRD diffractogram of pure sHAP (2Q: 15  $\mu\text{L g}^{-1}$  Neutrased, 7.5  $\mu\text{L g}^{-1}$  Lipozyme CALB L, 6 h, 40  $^{\circ}\text{C}$ ).

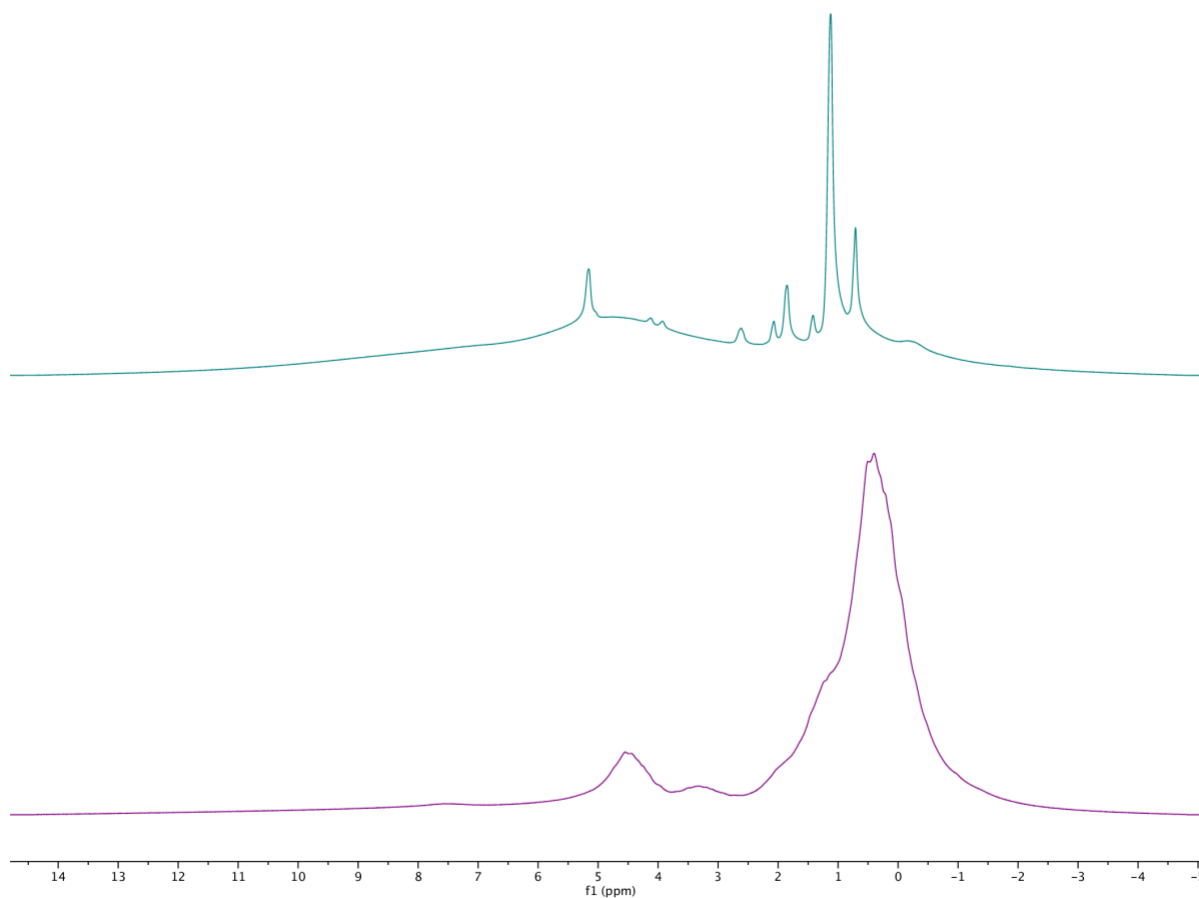

**Figure S13.**  $^1\text{H}$  MAS NMR spectra of pure sHAP (2Q:  $15\ \mu\text{L g}^{-1}$  Neutrase,  $7.5\ \mu\text{L g}^{-1}$  Lipozyme CALB L, 6 h,  $40\ ^\circ\text{C}$ ) (top, blue) and freeze-dried, raw salmon meat (bottom, purple).

**Equation S1.** Dynamic light scattering PDI:

$$\text{PDI} = \left( \frac{\text{st. dev.}}{\text{mean}} \right)^2$$

For generally nanoparticle or colloidal suspensions with little aggregation, a PDI of 0.1 – 0.4 would be expected. Anything above 0.4 indicates that the particles tend to aggregate and the solution is not monodisperse.

## *Life Cycle Analysis of Fish Processing Waste Treatments*

### *Assumed data for all compounds*

|                           |                                            |
|---------------------------|--------------------------------------------|
| Volume air                | = 1.00 x 10 <sup>10</sup> m <sup>3</sup>   |
| Volume water              | = 7.00 x 10 <sup>6</sup> m <sup>3</sup>    |
| Volume soil               | = 9.00 x 10 <sup>3</sup> m <sup>3</sup>    |
| Volume sediment           | = 2.00 x 10 <sup>4</sup> m <sup>3</sup>    |
| Density soil              | = 1.5 tonnes m <sup>-3</sup>               |
| Density sediment          | = 1.5 tonnes m <sup>-3</sup>               |
| Organic soil fraction     | = 0.02                                     |
| Organic fraction sediment | = 0.04                                     |
| Energy consumption        | = 0.042 g CO <sub>2</sub> kJ <sup>-1</sup> |

### *Equations used to calculate potentials*

$$\text{Acidification potential (I}_{AP}) = \sum AP_i \times m_i$$

If not a gas, AP<sub>i</sub> = 0

$$\text{Smog formation (I}_{SF}) = \sum SFP_i \times m_i$$

$$SFP_i = MIR_i / MIR_{ROG}$$

$$\text{Global warming (I}_{GW}) = \sum_i (GWP_i \times m_i) + (X \text{ g CO}_2 \text{ kJ}^{-1} \times Y \text{ kJ})$$

$$\text{Heating liquid} = m \times C_p \times (T_f - 293.15 \text{ K}) \times n$$

$$n = \text{time (h)} \times 0.5$$

$$\text{Oven/furnace} = (T_f - 293.15 \text{ K}) \times n$$

$$n = \text{time (h)} \times 0.5$$

$$\text{Toxic inhalation (I}_{INH}) = \sum_i INHTP_i \times m_i$$

$$INHTP_i = (C_{i,a} / LC_{50,i}) / (C_{tol,a} / LC_{50,tol})$$

$$\text{Toxic ingestion (I}_{ING}) = \sum_i INGTP_i \times m_i$$

$$INGTP_i = (C_{i,w} / LD_{50,w}) / (C_{tol,w} / LD_{50,w})$$

#### **Persistence (PER)**

If PER < weeks = LOW

If PER > weeks, < months = MOD

If PER > months = HIGH

$$\text{Bioaccumulation (ACCU)} = \log(K_{ow})$$

If log(K<sub>ow</sub>) < 3.5 = LOW

If log(K<sub>ow</sub>) 3.5 – 4.3 = MOD

If log(K<sub>ow</sub>) > 4.3 = HIGH

$$\begin{aligned} \text{Abiotic depletion (I}_{AD}) &= \sum_i \text{ADP}_i \times m_i \\ \text{ADP}_i &= ((\text{depletion rate})_i / (\text{reserves})_i) / (((\text{depletion rate})_{ref} / (\text{reserves})_{ref})) \end{aligned}$$

### ***Potentials omitted from Table 5 (LCA):***

I<sub>AP</sub> and I<sub>AD</sub> were 0 for all treatments discussed, therefore they have been omitted from the LCA table.

### ***Assumptions for enzymes***

**K<sub>oc</sub> value of enzymes:** This is not studied. Enzymes are soluble in water, therefore it should be close to 1. Methanol has a K<sub>ow</sub> of 0.18 and butanol has a K<sub>ow</sub> of 6.3. Therefore, we have assigned the K<sub>ow</sub> of enzymes to be 3 and its log(K<sub>ow</sub>) would be 0.48. To determine K<sub>oc</sub>, we multiplied K<sub>ow</sub> by 0.41 as suggested by Philip Jessop, therefore the value of K<sub>oc</sub> is 1.23.

**H value of enzymes:** This is not studied. However, because we assume they have zero volatility, its value has been assigned to H = 1 x 10<sup>-50</sup> as suggested by Jessop.

**Molecular weight of enzymes:** MW of proteases has been determined to be in the range of 15 to 30 kDa while the MW of lipases has been determined to be in the range of 19 to 60 kDa, therefore we assigned a MW of 22.5 kDa (2.25 x 10<sup>4</sup> g mol<sup>-1</sup>) to Neutrase and Alcalase and a MW of 39.5 kDa (3.95 x 10<sup>4</sup> g mol<sup>-1</sup>) to Lipozyme CALB L.

### ***Assumptions for NaOH and H<sub>2</sub>O<sub>2</sub> treatments***

**H value of NaOH:** NaOH has zero volatility, its value has been assigned to H = 1 x 10<sup>-50</sup> as suggested by Jessop.

**“Highly alkaline solution”:** assume this means 50% NaOH.

**For Ahamed et al.:** assume 250 g NaOH since not indicated.<sup>1</sup>

**For Yamamura et al.:** assume 200 g NaOH and 150 g H<sub>2</sub>O<sub>2</sub> since not indicated.<sup>2</sup>

### **References**

1. A. F. Ahamed, M. Manimohan and N. Kalaiivasan, *J. Inorg. Organomet. Polym.*, 2022, **32**, 3902–3922.
2. H. Yamamura, V. H. P. da Silva, P. L. M. Ruiz, V. Ussui, D. R. R. Lazar, A. C. M. Renno and D. A. Ribeiro, *J. Mech. Behav. Biomed. Mater.*, 2018, **80**, 137–142.
