# Supplementary material for: Isolation of hydroxyapatite from Atlantic salmon processing waste using a protease and lipase mixture
Source: Royal Society of Chemistry journal article supplement (doi:10.1039/d3su00102d), 2023-01-01
Supplement: d3su00102d2.xlsx [file d3su00102d2.xlsx]

## Sheet: Sheet1
Assumed data for all compounds			Our work
			Starting material mass:	350
Volume air (m3)	10000000000		Goal starting material mass	1000
Volume water (m3)	7000000		Factor	2.85714
Volume soil (m3)	9000
Volume sediemnt (m3)	20000
Density soil (tonnes m-3)	1.5		Chemicals used	mass (g)	mass (g) x factor	MW (g mol-1)	H	Kow	Koc	SFP	Cp (kJ g-1 K-1)	Z(air)	Z(water)	Z(soil)	Z(sediment)	Fugacity	C(air)	C(water)	LC50	LD50	INHTP	INGTP
Density sediment (tonnes m-3)	1.5		Water	2000	5714.29	18.02				0	0.00418
Organic soil fraction	0.02			1000	2857.14
Organic sediment fraction	0.04		Neutrase	1.5	4.28571	22500	1e-50	3	1.23	0		41	1e+50	3.69e+48	7.38e+48	6.34757e-59	Not volatile	6.34757e-09	Not volatile	2000	Not volatile	0.512268
Energy consumption (g CO2 kJ-1)	0.042		Lipozyme CALB L	0.75	2.14286	39500	1e-50	3	1.23	0		41	1e+50	3.69e+48	7.38e+48	6.35e-59	Not volatile	6.35e-09	Not volatile	27000	Not volatile	0.0379604
Toluene concentrations for toxicity potentials			1. Acidification potential			4. Toxic Inhalation
MW (g mol-1)	92.14		I(AP)	0		I(INHT)	0
H (atm m3 mol-1)	0.0067
log(Kow)	2.73		2. Smog formation			5. Toxic ingestion
Koc	220		I(SF)	0		I(INGT)	2.27678
LD50 (mg kg-1)	636
LC50	49		3. Global warming			6. Persistance
Z(air)	41		Emissions	0		PER	NO
Z(water)	149.254		Energy consumption
Z(soil)	985.075		a. Boiling water	1910.86		7. Bioaccumulation
Z(sediment)	1970.15		b. Enzyme treatment	5732.57		ACCU	0.778151
Fugacity	2.64005e-11		CO2 emissions	321.024
C(air)	1.08242e-09		I(GW)	321.024		8. Abiotic depletion
C(water)	3.94037e-09					I(AD)	0
			Nam et al.
			Starting material mass:	100
			Goal starting material mass	1000
			Factor	10
			Chemicals used	mass (g)	mass (g) x factor	MW (g mol-1)	H	Kow	Koc	SFP	Cp (kJ g-1 K-1)	Z(air)	Z(water)	Z(soil)	Z(sediment)	Fugacity	C(air)	C(water)	LC50	LD50	INHTP	INGTP
			Water	100	1000	18.02				0	0.00418
			Alcalase	0.4	4	22500	1e-50	3	1.23	0		41	1e+50	3.69e+48	7.38e+48	6.34757e-59	Not volatile	6.34757e-09	Not volatile	2000	Not volatile	0.512268
			1. Acidification potential			4. Toxic Inhalation
			I(AP)	0		I(INHT)	0
			2. Smog formation			5. Toxic ingestion
			I(SF)	0		I(INGT)	2.04907
			3. Global warming			6. Persistance
			Emissions	0		PER	NO
			Energy consumption
			a. Enzyme treatment	3009.6		7. Bioaccumulation
			b. Drying	480		ACCU	0.477121
			c. Calcination	6630
			CO2 emissions	425.023		8. Abiotic depletion
			I(GW)	425.023		I(AD)	0
			Venkatesan et al.
			Starting material mass:	?	*Assume already 1000 g
			Goal starting material mass	?
			Factor	?
			Chemicals used	mass (g)	MW (g mol-1)	H	Kow	Koc	SFP	Cp (kJ g-1 K-1)	Z(air)	Z(water)	Z(soil)	Z(sediment)	Fugacity	C(air)	C(water)	LC50	LD50	INHTP	INGTP
			Water	2000	18.02				0	0.00418
				1000
				500
				100
			Acetone	7.85	58.08	3.97e-05	0.575	5.37	0.180645	0.00214	41	25188.9	4057.93	8115.87	2.93555e-11	1.20358e-09	1.19123e-07	76	5800	0.716903	3.31503
			NaOH	10	40	1e-50		0	0		41	1e+50	0	0	3.57143e-56	1.46429e-54	3.57143e-06	Not volatile	340	Not volatile	1695.44
				8
			1. Acidification potential			4. Toxic Inhalation
			I(AP)	0		I(INHT)	5.62769
			2. Smog formation			5. Toxic ingestion
			I(SF)	1.41806		I(INGT)	51650
			3. Global warming			6. Persistance
			Emissions	0		PER	MOD
			Energy consumption
			a. Boiling water	9028.8		7. Bioaccumulation
			b. Boiling water	2675.2		ACCU	-0.240332
			c. 2%NaOH/acetone	334.4
			d. Drying	480		8. Abiotic depletion
			e. Alkaline treatment	150.48		I(AD)	0
			f. Drying	480
			CO2 emissions	552.253
			I(GW)	552.253
			Ahamed et al.
			Starting material mass:	1000
			Goal starting material mass	1000
			Factor	1
			Chemicals used	mass (g)	mass (g) x factor	MW (g mol-1)	H	Kow	Koc	SFP	Cp (kJ g-1 K-1)	Z(air)	Z(water)	Z(soil)	Z(sediment)	Fugacity	C(air)	C(water)	LC50	LD50	INHTP	INGTP
			Water	1000	1000	18.02				0	0.00418
			Butanol	40.5	40.5	74.1	8.76e-06	7.59	3.5	0.870968	0.00239	41	114155	11986.3	23972.6	1.11561e-11	4.57401e-10	1.27353e-06	8000	500	0.00258826	411.111
			NaOH (50%)*	250	250	40	1e-50		0	0		41	1e+50	0	0	3.57143e-56	1.46429e-54	3.57143e-06	Not volatile	340	Not volatile	1695.44
			Acetone	78.4	78.4	58.08	3.97e-05	0.575	5.37	0.180645	0.00214	41	25188.9	4057.93	8115.87	2.93555e-11	1.20358e-09	1.19123e-07	76	5800	0.716903	3.31503
			1. Acidification potential			4. Toxic Inhalation
			I(AP)	0		I(INHT)	56.31
			2. Smog formation			5. Toxic ingestion
			I(SF)	49.4368		I(INGT)	440771
			3. Global warming			6. Persistance
			Emissions	0		PER	MOD
			Energy consumption
			a. Boiling water	543.4		7. Bioaccumulation
			b. Drying	600		ACCU	0.911956
			c. Calcination	116400
			f. Drying	480		8. Abiotic depletion
			CO2 emissions	4956.98		I(AD)	0
			I(GW)	4956.98
			Yamamura et al.
			Starting material mass:	1000
			Goal starting material mass	1000
			Factor	1
			Chemicals used	mass (g)	mass (g) x factor	MW (g mol-1)	H	Kow	Koc	SFP	Cp (kJ g-1 K-1)	Z(air)	Z(water)	Z(soil)	Z(sediment)	Fugacity	C(air)	C(water)	LC50	LD50	INHTP	INGTP
			NaOH (1 N)*	200	200	40	1e-50		0	0		41	1e+50	0	0	3.57143e-56	1.46429e-54	3.57143e-06	Not volatile	340	Not volatile	1695.44
			Hydrogen peroxide (30%)*	150	150	34	1.08e-08	0.027	5.37	0		41	9.25926e+07	24.0448	2.98333e+07	4.53078e-14	1.85762e-12	4.19516e-06	2000	910	3.71524e-09	0.0038176
			1. Acidification potential			4. Toxic Inhalation
			I(AP)	0		I(INHT)	5.57286e-07
			2. Smog formation			5. Toxic ingestion
			I(SF)	0		I(INGT)	339089
			3. Global warming			6. Persistance
			Emissions	0		PER	NO
			Energy consumption
			a. Calcination	7800		7. Bioaccumulation
			CO2 emissions	327.6		ACCU	-1.56864
			I(GW)	327.6
						8. Abiotic depletion
						I(AD)	0
